# Supplementary material for: Breeding in winter wheat (Triticum aestivum L.) can be further progressed by targeting previously neglected competitive traits
Source: Front Plant Sci. 2025 Mar 19;16:1490483. doi: 10.3389/fpls.2025.1490483 (PMC11961425; doi:10.3389/fpls.2025.1490483)
Supplement: Supplementary file 2 [file Table1.xlsx]

## Sheet: GH1_2021
BRISONr	genotype	RYear	quality	country	decade	maturity	height	breeder
1	Einstein	2004	B	GB	2000	s	k	Nickerson/Limagrain
2	Oakley	2008	C	UK,BE	2000	s	k	KWS UK Limited
3	Jafet	2008	E	DE	2000	s	k	Sandra Senghaas-Kirschenlohr
4	Claire	1999	C	IE,UK	1990	s	k	Nickerson
5	Rebell	2013	A	DE	2010	s	k	RAGT
6	Memory	2013	B	DE	2010	s	k	Secobra Recherches
7	Kurt	2013	B	DE	2010	s	k	LIMAGRAIN GmbH
8	Zappa	2009	Ck	DE	2000	s	k	Ackermann Saatzucht
9	Chevalier	2005	A	EU	2000	s	k	DSV
10	Gordian	2013	B	DE	2010	s	k	Syngenta Seeds
11	Mentor	2012	B	DE	2010	s	k	RAGT/Mellinger
12	Meister	2010	A	DE	2010	s	k	RAGT/Mellinger
13	KWS Santiago	2011	C	GB	2010	s	k	KWS Lochow
14	Brigand	1979	BISC, D	GB	1970	s	k	Plant Breeding International Cambridge
15	Profilus	2008	A	DE	2000	s	k	RAGT/Mellinger
16	Durin	NA	NA	FR	NA	s	k	NA
17	KWS Pius	2010	A	DE	2010	s	k	KWS Lochow
18	Paroli	2004	A	DE	2000	s	k	DSV
19	Estivus	2012	A	DE	2010	s	k	Strube Saatzucht
20	Kronjuwel	1980	B	DE	1980	s	k	Bayrische Saatzuchtgesellschaft
21	Desamo	2013	B	DE	2010	s	k	Syngenta Seeds
22	Carenius	2006	B	DE	2000	s	k	Eger/Dieckmann (EU)
23	Mulan	2006	B	DE	2000	s	k	Nordsaat Saatzucht
24	Kredo	2009	B	DE	2000	s	k	Nordsaat Saatzucht
25	Nelson	2011	E	DE	2010	s	k	Saatzucht Schweiger
26	Patras	2012	A	DE	2010	s	k	DSV
27	Götz	1978	B	DE	1970	s	k	Bayrische Saatzuchtgesellschaft
28	Robigus	2004	Bk	GB	2000	s	k	KWS UK Limited, CPB Twyford Ltd
29	Anapolis	2013	C	DE	2010	s	k	NORDSAAT Saatzuchtgesellschaft
30	Solstice	2001	NA	GB	2000	s	k	Limagrain UK Ltd
31	Biscay	2000	C	DE	2000	s	k	Lochow-Petkus
32	Capone	2012	A	DE	2010	s	k	LIMAGRAIN GmbH
33	Tabasco	2008	C	DE	2000	s	k	v. Borris-Eckendorf
34	Kometus	2011	A	DE	2010	s	k	Saatzucht Schweiger
35	Cubus	2002	A	DE	2000	s	k	Lochow-Petkus
36	Edward	2013	B	DE	2010	s	k	W. von Borries-Eckendorf
37	Famulus	2010	E	DE	2010	s	k	DSV
38	Dekan	1999	B	DE	1990	s	k	Lochow-Petkus
39	SW Topper	2002	E	NA	2000	s	k	SW Seeds
40	Matrix	2010	B	DE	2010	s	k	DSV
41	Jenga	2007	A	DE	2000	s	k	Ackermann Saatzucht
42	Linus	2010	A	DE	2010	s	k	RAGT/Mellinger
43	TJB 990-15	1980	BISC, D	GB	1980	s	k	Plant Breeding International Cambridge (PBIC)
44	Forum	2012	A	EU	2010	s	k	Nordsaat Saatzucht
45	Colonia	2011	B	EU	2010	s	k	LIMAGRAIN GmbH
46	Transit	1994	A	DE	1990	s	k	Saatzucht Josef Breun
47	Potenzial	2006	A	DE	2000	s	k	DSV
48	Gaucho	1993	NA	USA	1990	s	k	USDA-ARS, Oklahoma AES
49	Tarso	1992	A	DE	1990	s	k	Saatzucht Hadmersleben
50	Hermann	2004	Ck	DE	2000	s	k	Limagrain-Nickerson
51	Glaucus	2011	A	DE	2010	s	k	Strube Saatzucht
52	Tuareg	2005	A	DE	2000	s	k	Nordsaat Saatzucht
53	Atomic	2012	A	DE	2010	s	k	LIMAGRAIN GmbH
54	Tobak	2011	B	DE	2010	s	k	W.v.Borries-Eckendorf
55	Pionier	2013	A	DE	2010	s	k	Deutsche Saatveredelung
56	Manager	2006	B	DE	2000	s	k	Saatzucht Schweiger GbR
57	Gourmet	2013	E	DE	2010	s	k	Secobra Recherches
58	Limes	2003	B	DE	2000	s	k	Innoseeds
59	Ritmo	1993	B	DE	1990	s	k	Cebeco
60	Kalahari	2010	B	EU	2010	s	k	LIMAGRAIN GmbH
61	Intro	2011	B	DE,FRA	2010	s	k	RAGT 2N
62	Oxal	2010	B	DE	2010	s	k	RAGT/Mellinger
63	Zobel	2006	A	DE	2000	s	k	Syngenta Cereals GmbH
64	Event	2009	E	DE	2000	s	k	Saatzucht Josef Breun
65	Joker	2012	A	DE	2010	s	k	DSV
66	Global	2009	B	DE,AT	2000	s	k	RAGT/Mellinger
67	Elixer	2012	C	DE	2010	s	k	v. Borris-Eckendorf
68	Fedor	2007	A	DE	2000	s	k	W. von Borries-Eckendorf
69	Türkis	2004	A	DE	2000	s	k	Lantmaennen SW Seed Hadmersleben GmbH
70	Skagen	2006	E	DE	2000	s	k	v. Borris-Eckendorf
71	Greif	1989	B	DE	1980	s	k	Lochow-Petkus
72	Esket	2007	A	DE	2000	s	k	RAGT/Mellinger
73	Primus	2009	B	DE	2000	s	k	DSV
74	Skalmeje	2006	C	DE	2000	s	k	KWS Lochow GmbH
75	Genius	2010	E	DE	2010	s	k	Nordsaat Saatzucht
76	Enorm	2002	E	DE	2000	s	k	Schweiger
77	Florian	2010	E	DE	2010	s	k	Nordsaat Saatzucht
78	Skater	2000	B	DE	2000	s	k	Limagrain-Nickerson
79	Brilliant	2005	A	DE	2000	s	k	SW Seeds
80	Inspiration	2007	B	DE	2000	s	k	Saatzucht Josef Breun GmbH & Co.KG
81	Apertus	2013	A	DE	2010	s	k	Dr. Hermann Strube
82	Ellvis	2002	A	DE	2000	s	k	Breun
83	Edgar	2010	B	DE	2010	s	k	LIMAGRAIN GmbH
84	Maris Huntsman	1975	A	DE	1970	s	k	Nordsaat
85	SY Ferry	2012	B	DE	2010	s	k	Syngenta Seeds GmbH
86	Landsknecht	2013	C	DE	2010	s	k	Secobra Recherches
87	Sponsor	1994	NA	FR, IE	1990	s	k	Unisigma
88	Impression	2005	A	DE	2000	s	k	Saatzucht Schweiger GbR
89	Winnetou	2002	C	DE	2000	s	k	Saatzucht Firlbeck
90	Toronto	1990	A	DE	1990	s	k	Strengs Erben
91	Torrild	2005	A	DE	2000	s	k	v. Borris-Eckendorf
92	Contra	1990	C	DE	1990	s	k	Saatzucht Breun
93	Schamane	2005	A	DE	2000	s	k	Saatzucht Engelen Buechling e.K.
94	Granada	1980	B	DE	1980	s	k	Schweiger
95	KWS Cobalt	2013	A	DE	2010	s	k	KWS LOCHOW GMBH
96	Tommi	2002	A	DE	2000	s	k	Nordsaat
97	Saturn	1973	B	DE	1970	s	k	MPI
98	Severin	1980	A9	NA	1980	s	k	Bauer, G.
99	JB Asano	2008	A	DE	2000	s	k	Saatzucht Josef Breun GmbH & Co.KG
100	Kerubino	2004	E	DE	2000	s	k	Saatzucht Schmid Landau
101	Arktis	2010	E	DE	2010	s	k	DSV
102	Urban	1980	E	DE	1980	s	k	Bauer, G.
103	Orestis	1988	B	DE	1980	s	k	Strube, Dr. H.
104	Flair	1996	B	DE	1990	s	k	Schweiger
105	Anthus	2005	B	DE	2000	s	k	KWS Lochow GmbH
106	Bombus	2012	C	DE	2010	s	k	Secobra Recherches
107	Lucius	2006	A	DE	2000	s	k	Secobra Recherches
108	Herzog	1986	A	DE	1980	s	k	Saatzucht Breun
109	Sorbas	1985	B	DE	1980	s	k	Strube, Dr. H.
110	Tabor	1979	A	DE	1970	s	k	Strube
111	Terrier	2001	B	DE	2000	s	k	Nickerson
112	Magister	2005	E	DE	2000	s	k	Bauer
113	Altos	2000	E	DE	2000	s	k	Syngenta Hadmersleben
114	Progress	1969	A	DE	1960	s	k	Hege
115	Xanthippe	2011	Ck	DE	2010	s	k	Sejet Planteforaedling I/S
116	Avenir	2013	A	DE	2010	s	k	Saatzucht Josef Breun
117	Pantus	1966	A	DE	1960	s	k	Streng
118	Drifter	1999	B	DE	1990	s	k	Nickerson
119	Joss	1972	C	DE	1970	s	k	Breustedt
120	Kranich	1969	A	DE	1960	s	k	Lochow-Petkus
121	Sperber	1982	A	DE	1980	s	k	Lochow-Petkus
122	Discus	2007	A	DE	2000	s	k	Pflanzenzucht SaKa GmbH&Co.KG
123	Helios	1980	NA	DE	2010	s	k	Saatzucht Schweiger
124	Obelisk	1987	B	NE, DE	1980	s	k	Strube, Dr. H.
125	Magnus	2000	A	DE	2000	s	l	Engelen Buechling
126	Disponent	1975	A	DE	1970	s	l	Bayrische Saatzuchtgesellschaft
127	Tambor	1993	A	DE	1990	s	l	Semundo
128	Boxer	2013	C	DE	2010	s	l	Ackermann Saatzucht
129	Sokrates	2001	A	DE	2000	s	l	Saatzucht Engelen
130	Carisuper	1975	A	DE	1970	s	l	Heidenreich und Eger
131	Rektor	1980	E	DE	1980	s	l	Firlbeck
132	Alves	2010	A	DE	2010	s	l	SW Seeds
133	NaturaStar	2002	A	DE	2000	s	l	Saatzucht Schweiger
134	Alidos	1987	E	DE	1980	s	l	Saatzucht Hadmersleben
135	Monopol	1975	E	DE	1970	s	l	Firlbeck
136	Akratos	2004	A	DE	2000	s	l	Strube Saatzucht
137	Knirps	1985	B	NA	1980	s	l	Semundo
138	Bussard	1990	E	DE	1990	s	l	Lochow-Petkus
139	Oberst	1980	A	DE	1980	s	l	Engelen Buechling
140	Cappelle Desprez	NA	B	FR, CHL, GB, NL	1940	s	l	SAS Florimond Desprez
141	Tiger	2001	A	DE	2000	s	l	Franck
142	Ibis	1991	A	DE	1990	s	l	Lochow-Petkus
143	Batis	1994	A	DE	1990	s	l	Strube, Dr. H.
144	Topfit	1972	B	DE	1970	s	l	Strube, Dr. H.
145	Akteur	2003	E	DE	2000	s	l	DSV
146	Ludwig	1998	A	DE	1990	s	l	Franck
147	Asketis	1998	A	DE	1990	s	l	Strube, Dr. H.
148	Aristos	1997	A	DE	1990	s	l	Strube, Dr. H.
149	Zentos	1989	E	DE	1980	s	l	Saatzucht Hadmersleben
150	Diplomat	1966	A	DE	1960	s	l	Firlbeck
151	Astron	1989	A	DE	1980	s	l	Strube, Dr. H.
152	Basalt	1980	B	DE	1980	s	l	Hege, H.-U.
153	Kormoran	1973	A	DE	1970	s	l	Lochow-Petkus
154	Aron	1992	E	DE	1990	s	l	Semundo
155	KWS Milaneco	2013	E	DE	2010	s	l	KWS LOCHOW GMBH
156	Aszita	2005	B	DE	2000	s	l	Getreidezüchtung Peter Kunz
157	Kobold	1978	B	DE	1970	s	l	Firlbeck
158	Carimulti	1975	B	DE	1970	s	l	Heidenreich und Eger
159	Admiral	1968	A	DE	1960	s	l	Firlbeck
160	Vuka	1975	A	DE	1970	s	l	Franck
161	Benno	1973	E	DE	1970	s	l	Bauer, G.
162	Apollo	1984	C	DE	1980	s	l	Saatzucht Breun
163	Aquila	1979	B3	EU	1970	s	l	Nickerson
164	Kanzler	1980	B	DE	1980	s	l	Engelen Buechling
165	Kraka	1982	A	DE	1980	s	l	Petersen, A.S.
166	Caribo	1968	B	DE	1960	s	l	Heidenreich und Eger
167	Butaro	2009	E	DE	2000	s	l	LandbauschuleDottenfelderhof e.V./Spieß
168	Konsul	1990	B	DE	1990	s	l	Svaloef Weibull
169	Ares	1983	B	DE	1980	s	l	Strube, Dr. H.
170	Centurk	1971	exot	USA	1970	f	l	Nebraska Agricultural Experiment Station, USDA-ARS
171	NS 22/92	NA	NA	SRB	NA	f	l	NA
172	Benni multifloret	1980	exot	USA	1980	f	l	Purdue University Agricultural Experiment Station
173	Hope	NA	NA	USA	1940	f	l	S.Dakota Agricultural Experiment Station
174	Vel	NA	NA	USA	NA	f	l	NA
175	Phoenix	1981	exot	AUS, USA	1980	f	l	Agricultural Research Institute, Wagga Wagga
176	Mironovska 808	1963	exot	UKR	1960	f	l	Mironovskii institut selektsii i semenovodstva pshenitsy
177	Caphorn	2000	NA	FR	2000	f	k	RAGT 2 n
178	Cordiale	2003	NA	GB	2000	f	k	KWS UK Limited
179	Apache	1997	A	CZ	1990	f	k	Nickerson>Limagrain
180	Premio	2006	B	FR	2000	f	k	RAGT
181	Isengrain	1996	B	EU	1990	f	k	Florimond Desprez, WvB, Witt
182	Alixan	2005	A	FR	2000	f	k	Limagrain
183	Boregar	2007	A7	FR	2000	f	k	RAGT 2 n
184	Renesansa	1995	A2-A1	SRB	1990	f	k	Institute of Field and Vegetable Crops, Novi Sad
185	Tremie	1991	NA	EU	1990	f	k	Serasem>RAGT
186	KWS Ferrum	2012	B	DE	2010	f	k	KWS LOCHOW GMBH
187	Triple Dirk "S"	NA	NA	AUS	NA	f	k	Instituto Nacional de Investigaciones Agricolas
188	Cardos	1998	A	DE	1990	f	k	Saatzucht Hadmersleben
189	Soissons	1987	B/A	EU	1980	f	k	Florimond Desprez
190	BCD 1302/83	NA	NA	MD	NA	f	k	Goertzen Seed Research, Westbred?
191	Arlequin	2007	NA	FR	2000	f	k	Limagrain Verneuil Holding
192	Sonalika	1967	exot	IND	1960	f	k	Indian Agricultural Research Institute IARI
193	Camp Remy	1980	B	DE	1980	f	k	Unisigma
194	Cajeme 71	1971	exot	MEX	1970	f	k	CIMMYT
195	Avalon	1980	B/Gd	GB	1980	f	k	Plant Breeding International Cambridge PBIC
196	Ivanka	1998	B	SRB	1990	f	k	Institute of Field and Vegetable Crops, Novi Sad
197	Pobeda	1990	A1-A2	SRB	1990	f	k	Institute of Field and Vegetable Crops, Novi Sad
198	NS 66/92	NA	NA	SRB	NA	f	k	NA
199	Mexico 3	NA	NA	MEX	NA	f	k	BAZ, Braunschweig Genetic Resources Centre
200	Orcas	2010	B	DE	2010	f	k	Secobra Recherches
201	Nimbus	1975	B	DE	1970	f	k	Firlbeck
202	Muskat	2010	C	DE	2010	f	k	DSV
203	Florida	1986	NA	USA	1980	f	k	NA
204	Rumor	2013	B	DE	2010	f	k	Dr. Hermann Strube
205	Highbury	1968	A	GB	1960	f	k	Plant Breeding International Cambridge (PBIC)
206	Siete Cerros	1966	exot	MEX	1960	f	k	Instituto Nacional de Investigaciones Agricolas, CIMMYT
207	Kontrast	1990	A	DE	1990	f	k	Saatzucht Hadmersleben
208	WW 4180	2012	NA	DE	2010	f	k	Saatzucht Josef Breun
209	INTRO 615	NA	NA	USA	NA	f	k	NA
210	NS 46/90	NA	NA	SRB	NA	f	k	NA
211	Mex. 17 bb	NA	NA	MEX	NA	f	k	CYMMIT
212	Labriego-Inia	1980	NA	CHL	1980	f	k	INIA Chillan
213	Pegassos	1994	A	EU	1990	f	k	Strube Saatzucht
219	Piko	1994	B	DE	1990	f	k	NORDSAAT
220	SUR 99820	NA	NA	FR	NA	f	k	Saaten Union Recherche SAS ?
221	Julius	2008	A		2008			KWS Lochow
222	RGT Reform	2014	A		2014			RAGT
223	Benchmark	2015	B		2015			Sejet
224	Barranco	2016	E		2016			Secobra
225	Nordkap	2016	A		2016			Nordsaat
226	Porthus	2016	B		2016			Strube
227	Sheriff	2016	C		2016			ISZ/Sejet
228	Apostel	2016	A		2016			Streng

## Sheet: GH2_2022
Genotype	Year of release	Quality	Country	Breeder
Einstein	2004	B	GB	Nickerson/Limagrain
Oakley	2008	C	UK,BE	KWS UK Limited
Jafet	2008	E	DE	Sandra Senghaas-Kirschenlohr
Claire	1999	C	IE,UK	Nickerson
Rebell	2013	A	DE	RAGT
Memory	2013	B	DE	Secobra Recherches
Kurt	2013	B	DE	LIMAGRAIN GmbH
Zappa	2009	Ck	DE	Ackermann Saatzucht
Chevalier	2005	A	EU	DSV
Gordian	2013	B	DE	Syngenta Seeds
Mentor	2012	B	DE	RAGT/Mellinger
Meister	2010	A	DE	RAGT/Mellinger
KWS Santiago	2011	C	GB	KWS Lochow
Brigand	1979	BISC, D	GB	Plant Breeding International Cambridge
Durin	NA	NA	FR	NA
KWS Pius	2010	A	DE	KWS Lochow
Estivus	2012	A	DE	Strube Saatzucht
Kronjuwel	1980	B	DE	Bayrische Saatzuchtgesellschaft
Desamo	2013	B	DE	Syngenta Seeds
Carenius	2006	B	DE	Eger/Dieckmann (EU)
Mulan	2006	B	DE	Nordsaat Saatzucht
Kredo	2009	B	DE	Nordsaat Saatzucht
Nelson	2011	E	DE	Saatzucht Schweiger
Patras	2012	A	DE	DSV
Götz	1978	B	DE	Bayrische Saatzuchtgesellschaft
Robigus	2004	Bk	GB	KWS UK Limited, CPB Twyford Ltd
Anapolis	2013	C	DE	NORDSAAT Saatzuchtgesellschaft
Solstice	2001	NA	GB	Limagrain UK Ltd
Biscay	2000	C	DE	Lochow-Petkus
Capone	2012	A	DE	LIMAGRAIN GmbH
Tabasco	2008	C	DE	v. Borris-Eckendorf
Kometus	2011	A	DE	Saatzucht Schweiger
Cubus	2002	A	DE	Lochow-Petkus
Edward	2013	B	DE	W. von Borries-Eckendorf
Famulus	2010	E	DE	DSV
Dekan	1999	B	DE	Lochow-Petkus
SW Topper	2002	E	NA	SW Seeds
Jenga	2007	A	DE	Ackermann Saatzucht
TJB 990-15	1980	BISC, D	GB	Plant Breeding International Cambridge (PBIC)
Forum	2012	A	EU	Nordsaat Saatzucht
Colonia	2011	B	EU	LIMAGRAIN GmbH
Transit	1994	A	DE	Saatzucht Josef Breun
Potenzial	2006	A	DE	DSV
Gaucho	1993	NA	USA	USDA-ARS, Oklahoma AES
Tarso	1992	A	DE	Saatzucht Hadmersleben
Hermann	2004	Ck	DE	Limagrain-Nickerson
Glaucus	2011	A	DE	Strube Saatzucht
Tuareg	2005	A	DE	Nordsaat Saatzucht
Atomic	2012	A	DE	LIMAGRAIN GmbH
Tobak	2011	B	DE	W.v.Borries-Eckendorf
Pionier	2013	A	DE	Deutsche Saatveredelung
Manager	2006	B	DE	Saatzucht Schweiger GbR
Gourmet	2013	E	DE	Secobra Recherches
Limes	2003	B	DE	Innoseeds
Ritmo	1993	B	DE	Cebeco
Kalahari	2010	B	EU	LIMAGRAIN GmbH
Intro	2011	B	DE,FRA	RAGT 2N
Oxal	2010	B	DE	RAGT/Mellinger
Zobel	2006	A	DE	Syngenta Cereals GmbH
Event	2009	E	DE	Saatzucht Josef Breun
Joker	2012	A	DE	DSV
Global	2009	B	DE,AT	RAGT/Mellinger
Elixer	2012	C	DE	v. Borris-Eckendorf
Fedor	2007	A	DE	W. von Borries-Eckendorf
Türkis	2004	A	DE	Lantmaennen SW Seed Hadmersleben GmbH
Skagen	2006	E	DE	v. Borris-Eckendorf
Greif	1989	B	DE	Lochow-Petkus
Esket	2007	A	DE	RAGT/Mellinger
Primus	2009	B	DE	DSV
Skalmeje	2006	C	DE	KWS Lochow GmbH
Genius	2010	E	DE	Nordsaat Saatzucht
Enorm	2002	E	DE	Schweiger
Florian	2010	E	DE	Nordsaat Saatzucht
Skater	2000	B	DE	Limagrain-Nickerson
Brilliant	2005	A	DE	SW Seeds
Inspiration	2007	B	DE	Saatzucht Josef Breun GmbH & Co.KG
Apertus	2013	A	DE	Dr. Hermann Strube
Ellvis	2002	A	DE	Breun
Edgar	2010	B	DE	LIMAGRAIN GmbH
Maris Huntsman	1975	A	DE	Nordsaat
SY Ferry	2012	B	DE	Syngenta Seeds GmbH
Landsknecht	2013	C	DE	Secobra Recherches
Sponsor	1994	NA	FR, IE	Unisigma
Impression	2005	A	DE	Saatzucht Schweiger GbR
Winnetou	2002	C	DE	Saatzucht Firlbeck
Toronto	1990	A	DE	Strengs Erben
Torrild	2005	A	DE	v. Borris-Eckendorf
Contra	1990	C	DE	Saatzucht Breun
Schamane	2005	A	DE	Saatzucht Engelen Buechling e.K.
Granada	1980	B	DE	Schweiger
KWS Cobalt	2013	A	DE	KWS LOCHOW GMBH
Tommi	2002	A	DE	Nordsaat
Saturn	1973	B	DE	MPI
Severin	1980	A9	NA	Bauer, G.
JB Asano	2008	A	DE	Saatzucht Josef Breun GmbH & Co.KG
Kerubino	2004	E	DE	Saatzucht Schmid Landau
Arktis	2010	E	DE	DSV
Urban	1980	E	DE	Bauer, G.
Orestis	1988	B	DE	Strube, Dr. H.
Flair	1996	B	DE	Schweiger
Anthus	2005	B	DE	KWS Lochow GmbH
Bombus	2012	C	DE	Secobra Recherches
Lucius	2006	A	DE	Secobra Recherches
Herzog	1986	A	DE	Saatzucht Breun
Sorbas	1985	B	DE	Strube, Dr. H.
Tabor	1979	A	DE	Strube
Terrier	2001	B	DE	Nickerson
Altos	2000	E	DE	Syngenta Hadmersleben
Xanthippe	2011	Ck	DE	Sejet Planteforaedling I/S
Avenir	2013	A	DE	Saatzucht Josef Breun
Pantus	1966	A	DE	Streng
Drifter	1999	B	DE	Nickerson
Joss	1972	C	DE	Breustedt
Kranich	1969	A	DE	Lochow-Petkus
Sperber	1982	A	DE	Lochow-Petkus
Discus	2007	A	DE	Pflanzenzucht SaKa GmbH&Co.KG
Helios	1980	NA	DE	Saatzucht Schweiger
Obelisk	1987	B	NE, DE	Strube, Dr. H.
Magnus	2000	A	DE	Engelen Buechling
Tambor	1993	A	DE	Semundo
Boxer	2013	C	DE	Ackermann Saatzucht
Carisuper	1975	A	DE	Heidenreich und Eger
Rektor	1980	E	DE	Firlbeck
Alves	2010	A	DE	SW Seeds
NaturaStar	2002	A	DE	Saatzucht Schweiger
Alidos	1987	E	DE	Saatzucht Hadmersleben
Monopol	1975	E	DE	Firlbeck
Akratos	2004	A	DE	Strube Saatzucht
Knirps	1985	B	NA	Semundo
Bussard	1990	E	DE	Lochow-Petkus
Oberst	1980	A	DE	Engelen Buechling
Cappelle Desprez	NA	B	FR, CHL, GB, NL	SAS Florimond Desprez
Ibis	1991	A	DE	Lochow-Petkus
Batis	1994	A	DE	Strube, Dr. H.
Akteur	2003	E	DE	DSV
Ludwig	1998	A	DE	Franck
Asketis	1998	A	DE	Strube, Dr. H.
Aristos	1997	A	DE	Strube, Dr. H.
Zentos	1989	E	DE	Saatzucht Hadmersleben
Diplomat	1966	A	DE	Firlbeck
Astron	1989	A	DE	Strube, Dr. H.
Basalt	1980	B	DE	Hege, H.-U.
Kormoran	1973	A	DE	Lochow-Petkus
Aron	1992	E	DE	Semundo
KWS Milaneco	2013	E	DE	KWS LOCHOW GMBH
Aszita	2005	B	DE	Getreidezüchtung Peter Kunz
Kobold	1978	B	DE	Firlbeck
Carimulti	1975	B	DE	Heidenreich und Eger
Admiral	1968	A	DE	Firlbeck
Vuka	1975	A	DE	Franck
Benno	1973	E	DE	Bauer, G.
Apollo	1984	C	DE	Saatzucht Breun
Aquila	1979	B3	EU	Nickerson
Kanzler	1980	B	DE	Engelen Buechling
Kraka	1982	A	DE	Petersen, A.S.
Caribo	1968	B	DE	Heidenreich und Eger
Butaro	2009	E	DE	LandbauschuleDottenfelderhof e.V./Spieß
Konsul	1990	B	DE	Svaloef Weibull
Ares	1983	B	DE	Strube, Dr. H.
Benni multifloret	1980	exot	USA	Purdue University Agricultural Experiment Station
Hope	NA	NA	USA	S.Dakota Agricultural Experiment Station
Vel	NA	NA	USA	NA
Phoenix	1981	exot	AUS, USA	Agricultural Research Institute, Wagga Wagga
Apache	1997	A	CZ	Nickerson>Limagrain
Premio	2006	B	FR	RAGT
Isengrain	1996	B	EU	Florimond Desprez, WvB, Witt
Boregar	2007	A7	FR	RAGT 2 n
Renesansa	1995	A2-A1	SRB	Institute of Field and Vegetable Crops, Novi Sad
KWS Ferrum	2012	B	DE	KWS LOCHOW GMBH
Cardos	1998	A	DE	Saatzucht Hadmersleben
Soissons	1987	B/A	EU	Florimond Desprez
BCD 1302/83	NA	NA	MD	Goertzen Seed Research, Westbred?
Arlequin	2007	NA	FR	Limagrain Verneuil Holding
Sonalika	1967	exot	IND	Indian Agricultural Research Institute IARI
Camp Remy	1980	B	DE	Unisigma
Cajeme 71	1971	exot	MEX	CIMMYT
Avalon	1980	B/Gd	GB	Plant Breeding International Cambridge PBIC
Ivanka	1998	B	SRB	Institute of Field and Vegetable Crops, Novi Sad
Mexico 3	NA	NA	MEX	BAZ, Braunschweig Genetic Resources Centre
Orcas	2010	B	DE	Secobra Recherches
Nimbus	1975	B	DE	Firlbeck
Muskat	2010	C	DE	DSV
Florida	1986	NA	USA	NA
Siete Cerros	1966	exot	MEX	Instituto Nacional de Investigaciones Agricolas, CIMMYT
Kontrast	1990	A	DE	Saatzucht Hadmersleben
INTRO 615	NA	NA	USA	NA
NS 46/90	NA	NA	SRB	NA
Mex. 17 bb	NA	NA	MEX	CYMMIT
Labriego-Inia	1980	NA	CHL	INIA Chillan
Pegassos	1994	A	EU	Strube Saatzucht
Piko	1994	B	DE	NORDSAAT
SUR 99820	NA	NA	FR	Saaten Union Recherche SAS ?
Julius	2008	A		KWS Lochow
RGT Reform	2014	A		RAGT
Benchmark	2015	B		Sejet
Barranco	2016	E		Secobra
Nordkap	2016	A		Nordsaat
Porthus	2016	B		Strube
Sheriff	2016	C		ISZ/Sejet
Apostel	2016	A		Streng
